# Supplementary material
Source: MDPI journal article supplement (https://www.mdpi.com/2073-4395/14/12/3040)
Supplement: s1 [file agronomy-3054420-supplementary.pdf › agronomy-3054420-supplementary.pdf]

**Supplementary Table S1.** General characteristics and management practices in the 20 surveyed orchards of Valencia Late orange in the Gharb plain of Morocco.

| Sample | Rural commune      | Farm size (ha) | District     | Planting age | Rootstock        | Plantation density | Irrigation mode |
|--------|--------------------|----------------|--------------|--------------|------------------|--------------------|-----------------|
| 1      | Souk Tlet El Gharb | 24             | Kenitra      | 7            | Macrophylla      | 6 X 3              | Drip            |
| 2      | Souk Tlet El Gharb | 12             | Kenitra      | 6            | Carrizo citrange | 6 X 3              | Flood           |
| 3      | Sidi Allal Tazi    | 11             | Kenitra      | 8            | Volkameriana     | 6 X 3              | Drip            |
| 4      | Dar Bel Amri       | 4              | Sidi slimane | 32           | Sour orange      | 6 x 6              | Flood           |
| 5      | Dar Bel Amri       | 2              | Sidi slimane | 11           | Volkameriana     | 6 X 6              | Flood           |
| 6      | Boumaiz            | 2              | Sidi slimane | 65           | Sour orange      | 6 X 6              | Flood           |
| 7      | Ouled H'Cine       | 25             | Sidi slimane | 26           | Sour orange      | 6 X 4              | Drip            |
| 8      | Ouled H'Cine       | 4              | Sidi slimane | 6            | Macrophylla      | 5 X 3              | Drip            |
| 9      | Ouled H'Cine       | 2              | Sidi slimane | 6            | Volkameriana     | 6 X 3              | Drip            |
| 10     | M'Saada            | 2              | Sidi slimane | 51           | Sour orange      | 6 x 6              | Flood           |
| 11     | Oulad Nouel        | 9              | Sidi Kacem   | 16           | Sour orange      | 6 X 3              | Drip            |
| 12     | Khenichet          | 250            | Sidi Kacem   | 40           | Sour orange      | 6 X 3              | Drip            |
| 13     | Boumaiz            | 48             | Sidi slimane | 33           | Sour orange      | 6 X 3              | Flood           |
| 14     | Oulad hammadi Ben  | 5              | Sidi slimane | 9            | Carrizo citrange | 6 X 3              | Drip            |
| 15     | Oulad hammadi Ben  | 6              | Sidi slimane | 17           | Carrizo citrange | 6 X 4              | Drip            |
| 16     | Zirara             | 4              | Sidi Kacem   | 8            | Macrophylla      | 7 X 3              | Flood           |
| 17     | EL Houfate         | 130            | Sidi Kacem   | 7            | Macrophylla      | 6 X 3              | Drip            |
| 18     | Sidi Al Kamel      | 12             | Sidi Kacem   | 6            | Macrophylla      | 7 X 3              | Drip            |
| 19     | Sefsaf             | 30             | Sidi Kacem   | 30           | Carrizo citrange | 5 X 3              | Flood           |
| 20     | Sidi Azzouz        | 200            | Sidi Kacem   | 4            | Macrophylla      | 6 X 3              | Flood           |

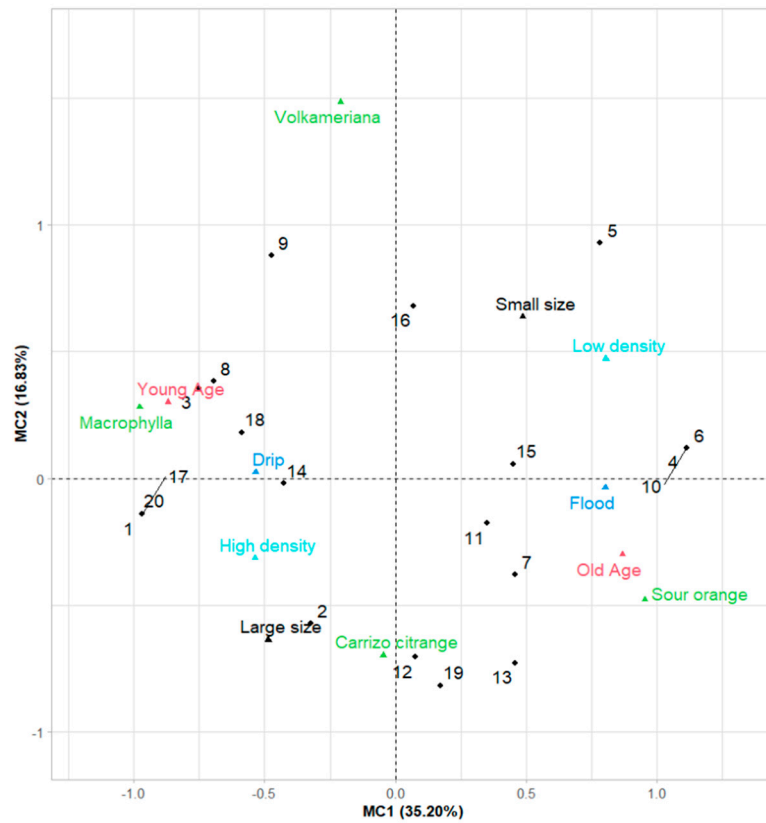

**Supplementary Figure S1:** Multiple correspondence analysis (MCA) of surveyed orchards according to irrigation type (drip and flood), planting age (young:  $\leq 10$  years, old:  $> 10$  years), planting density (high:  $> 500$  tree ha<sup>-1</sup>, low:  $< 500$  tree ha<sup>-1</sup>), rootstock (Macrophylla, Volkameriana, Carrizo citrange, Sour orange), and farm size (small:  $\leq 10$  ha, large:  $> 10$  ha).

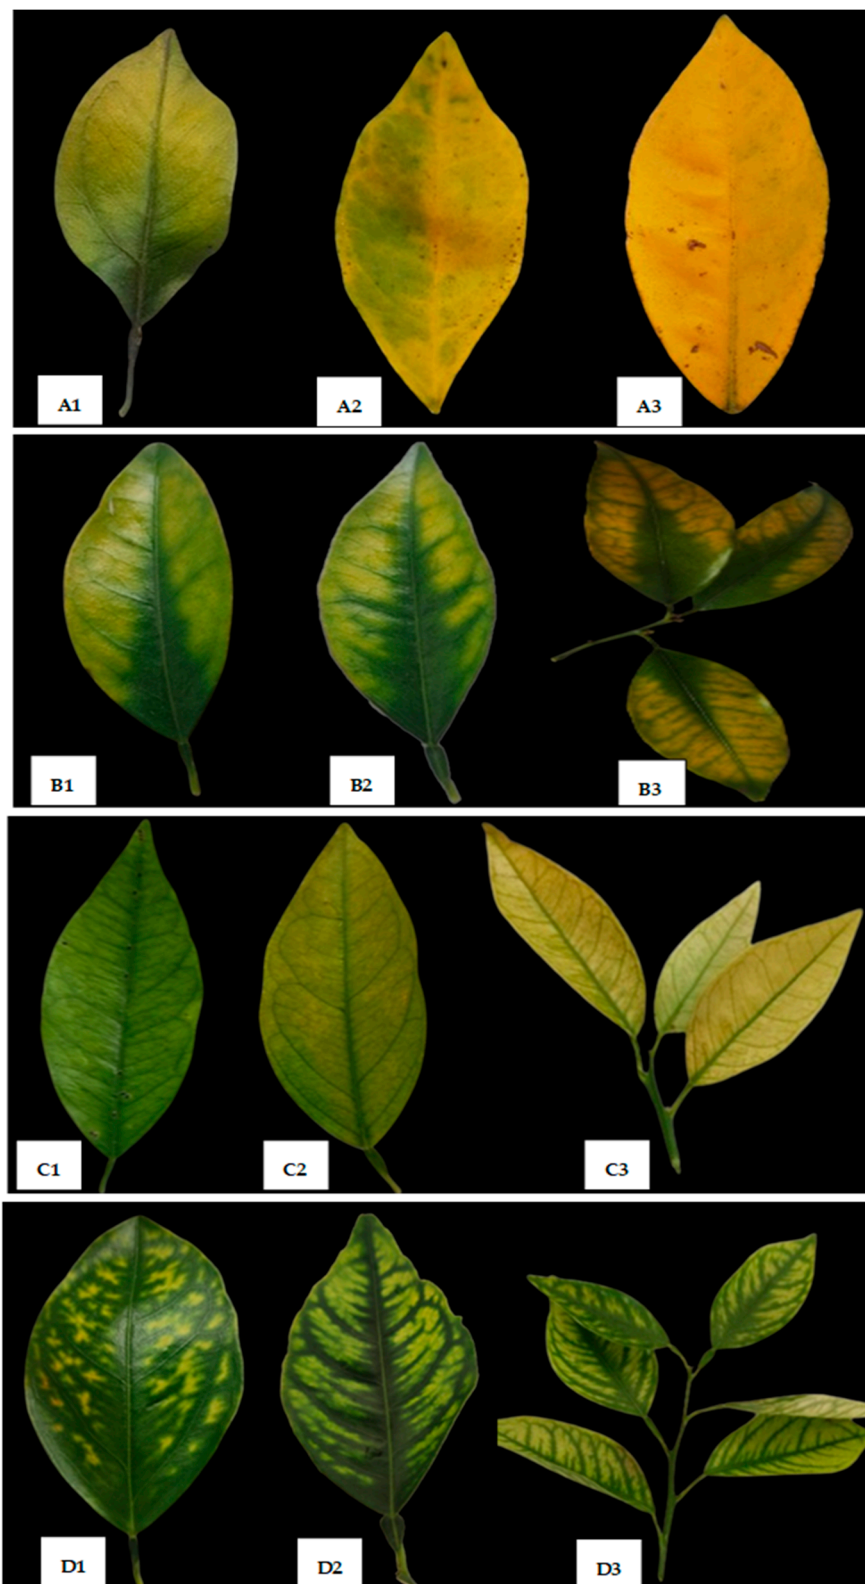

**Supplementary Figure S2:** Frequent deficiency symptoms observed during leaf sampling in the studied orchards of the Gharb plain in Morocco. Mild to severe from left to right. Symptoms of nitrogen (A1, A2, A3), magnesium (B1, B2, B3), iron (C1, C2, C3), and zinc (D1, D2, D3) deficiencies observed during leaf sampling at the studied orchards in the Gharb plain of Morocco.
